# Supplementary material for: Response of conventional sunflower cultivars to drift rates of synthetic auxin herbicides
Source: PeerJ journal article supplement (doi:10.7717/peerj.16729), 2024-01-10
Supplement: QUALITY.pdf [file QUALITY.pdf]

## QUALITY PARAMETERS OF IRRIGATION WATER

| PARAMETER                           | RESULT | UNIT             |
|-------------------------------------|--------|------------------|
| pH:                                 | 7.66   | -                |
| ELECTRICAL CONDUCTIVITY (EC):       | 749.97 | $\mu\text{S/cm}$ |
| SODIUM (Na):                        | 19.27  | ppm              |
| POTASIUM (K):                       | 15.2   | ppm              |
| CALCIUM (Ca):                       | 1,7    | me/L             |
| MAGNESIUM (Mg):                     | 1.9    | me/L             |
| CARBON TRIOXIDE (CO <sub>3</sub> ): | 1.2    | me/L             |
| BICARBONATE (HCO <sub>3</sub> ):    | 1.8    | me/L             |
| CLOR (Cl):                          | 1.2    | me/L             |
| SULPHATE (SO <sub>4</sub> ):        | 3.31   | me/L             |
| SODIUM ADSORPTION RATE (SAR):       | 0.63   | -                |
| RESIDUAL SODIUM CARBONATE (RSC)     | -0.6   | me/L             |
| %Na                                 | 25.42  | -                |
