# Supplementary material for: Response of conventional sunflower cultivars to drift rates of synthetic auxin herbicides
Source: PeerJ. 2024 Jan 10;12:e16729. doi: 10.7717/peerj.16729 (PMC10787541; doi:10.7717/peerj.16729)
Supplement: Supplemental Information 1 [file peerj-12-16729-s001.xlsx]

## Sheet: Dose-response
FBP						Quinclorac
dose	variety	dry_weight	dose	variety	dry_weight	dose	variety	dry_weight	dose	variety	dry_weight
0	bosfora	2.4	0	tunca	3.31	0	bosfora	2.56	0	tunca	3.81
0	bosfora	2.25	0	tunca	3.44	0	bosfora	2.55	0	tunca	3.78
0	bosfora	3.15	0	tunca	2.8	0	bosfora	4.5	0	tunca	3.33
0	bosfora	4.36	0	tunca	4.61	0	bosfora	2.57	0	tunca	3.64
0.51	bosfora	1.41	0.51	tunca	3.12	2.93	bosfora	3.2	2.93	tunca	3.91
0.51	bosfora	2.78	0.51	tunca	4.22	2.93	bosfora	3.07	2.93	tunca	3.22
0.51	bosfora	3.7	0.51	tunca	1.38	2.93	bosfora	3.6	2.93	tunca	3.03
0.51	bosfora	2.93	0.51	tunca	2.13	2.93	bosfora	2.65	2.93	tunca	3.14
1.02	bosfora	0.62	1.02	tunca	2.38	5.86	bosfora	2.19	5.86	tunca	2.39
1.02	bosfora	1.44	1.02	tunca	1.47	5.86	bosfora	2.17	5.86	tunca	2.04
1.02	bosfora	0.76	1.02	tunca	2.1	5.86	bosfora	2.99	5.86	tunca	2.53
1.02	bosfora	1.69	1.02	tunca	1.87	5.86	bosfora	2.89	5.86	tunca	4.36
2.03	bosfora	0.52	2.03	tunca	0.88	11.72	bosfora	1.93	11.72	tunca	3.35
2.03	bosfora	1.38	2.03	tunca	0.72	11.72	bosfora	1.6	11.72	tunca	3.43
2.03	bosfora	0.54	2.03	tunca	0.92	11.72	bosfora	2.77	11.72	tunca	2.86
2.03	bosfora	0.42	2.03	tunca	1.2	11.72	bosfora	1.71	11.72	tunca	1.61
4.06	bosfora	0.44	4.06	tunca	0.69	23.44	bosfora	2.13	23.44	tunca	1.4
4.06	bosfora	0.12	4.06	tunca	1.12	23.44	bosfora	1.55	23.44	tunca	1.44
4.06	bosfora	0.24	4.06	tunca	0.97	23.44	bosfora	1.61	23.44	tunca	1.81
4.06	bosfora	0.2	4.06	tunca	0.65	23.44	bosfora	2.16	23.44	tunca	1.92
8.13	bosfora	0.31	8.13	tunca	0.75	46.88	bosfora	1.6	46.88	tunca	1.42
8.13	bosfora	0.24	8.13	tunca	0.58	46.88	bosfora	2.08	46.88	tunca	2.01
8.13	bosfora	0.34	8.13	tunca	0.6	46.88	bosfora	1.43	46.88	tunca	1.15
8.13	bosfora	0.25	8.13	tunca	0.88	46.88	bosfora	1.71	46.88	tunca	2.22
16.25	bosfora	0.33	16.25	tunca	0.65	93.75	bosfora	2.11	93.75	tunca	1.73
16.25	bosfora	0.38	16.25	tunca	0.21	93.75	bosfora	1.57	93.75	tunca	1.35
16.25	bosfora	0.2	16.25	tunca	0.47	93.75	bosfora	1.62	93.75	tunca	1.02
16.25	bosfora	0.27	16.25	tunca	0.27	93.75	bosfora	1.14	93.75	tunca	1.37
