# Supplementary material for: Response of conventional sunflower cultivars to drift rates of synthetic auxin herbicides
Source: PeerJ. 2024 Jan 10;12:e16729. doi: 10.7717/peerj.16729 (PMC10787541; doi:10.7717/peerj.16729)
Supplement: Supplemental Information 2 [file peerj-12-16729-s002.xlsx]

## Sheet: Yield component
Bosfora				Tunca				Bosfora				Tunca				Bosfora				Tunca				Bosfora				Tunca
FBP		Quinclorac		FBP		Quinclorac		FBP		Quinclorac		FBP		Quinclorac		FBP		Quinclorac		FBP		Quinclorac		FBP		Quinclorac		FBP		Quinclorac
Dose	Plant height	Dose	Plant height	Dose	Plant height	Dose	Plant height	Dose	Head diameter	Dose	Head diameter	Dose	Head diameter	Dose	Head diameter	Dose	OTSW	Dose	OTSW	Dose	OTSW	Dose	OTSW	Dose	Yield	Dose	Yield	Dose	Yield	Dose	Yield
0	181.4	0	181.4	0	149	0	149	0	23.2	0	23.2	0	19.2	0	19.2	0	54.09	0	54.09	0	58.32	0	58.32	0	1944	0	1944	0	2498	0	2498
0	177.6	0	177.6	0	159	0	159	0	20.6	0	20.6	0	18.8	0	18.8	0	54.53	0	54.53	0	57.7	0	57.7	0	1928.8	0	1928.8	0	2537.4	0	2537.4
0	173.4	0	173.4	0	156	0	156	0	18	0	18	0	20.4	0	20.4	0	53.27	0	53.27	0	59.38	0	59.38	0	2018.8	0	2018.8	0	2521.8	0	2521.8
0	163	0	163	0	154.2	0	154.2	0	18.6	0	18.6	0	19	0	19	0	51.66	0	51.66	0	56.14	0	56.14	0	1954	0	1954	0	2348.06	0	2348.06
2.03	153	11.72	145.2	2.03	138.8	11.72	136.6	2.03	8.4	11.72	15.8	2.03	10.8	11.72	17.6	2.03	40.7	11.72	49.485	2.03	48.6	11.72	51.92	3.125	396	11.72	1073.2	2.03	678.4	11.72	2141.4
2.03	165	11.72	154	2.03	138.2	11.72	129.2	2.03	8.6	11.72	16.4	2.03	9.6	11.72	19	2.03	43.125	11.72	50.24	2.03	43.6	11.72	52.98	3.125	400	11.72	1102	2.03	637.4	11.72	2015
2.03	157.2	11.72	151.2	2.03	142.4	11.72	135	2.03	7.2	11.72	15.4	2.03	10.4	11.72	16.8	2.03	41.6	11.72	52.74	2.03	45.2	11.72	54.74	3.125	384	11.72	1060.4	2.03	627	11.72	2051.8
2.03	164	11.72	154.8	2.03	141.2	11.72	131.6	2.03	8.6	11.72	17.2	2.03	9.8	11.72	17.2	2.03	43.6	11.72	54.78	2.03	47.8	11.72	55.7	3.125	408	11.72	1070	2.03	605.6	11.72	2021.8
4.06	128.8	23.44	129.6	4.06	137.6	23.44	127.2	4.06	5	23.44	11.6	4.06	4.2	23.44	16.8	4.06		23.44	48.58	4.06		23.44	50.48	6.25		23.44	716	4.06		23.44	1095.2
4.06	125.2	23.44	132.6	4.06	137.6	23.44	133.2	4.06	4	23.44	12	4.06	4.6	23.44	15.8	4.06		23.44	49.2	4.06		23.44	52.42	6.25		23.44	726	4.06		23.44	1006.2
4.06	121.4	23.44	130.4	4.06	134.8	23.44	123.6	4.06	4.6	23.44	11.4	4.06	4.6	23.44	15.4	4.06		23.44	45.2	4.06		23.44	54.62	6.25		23.44	700	4.06		23.44	1043.6
4.06	118.8	23.44	113.4	4.06	143.6	23.44	131.8	4.06	5.4	23.44	10.2	4.06	4.2	23.44	14.8	4.06		23.44	47	4.06		23.44	49	6.25		23.44	708	4.06		23.44	992.4
8.13	102	46.88	122.2	8.13	104.4	46.88	111	8.13		46.88	8.6	8.13		46.88	10.8	8.13		46.88	47.6	8.13		46.88	44.16	12.5		46.88	230	8.13		46.88	465
8.13	100	46.88	118	8.13	106	46.88	113.6	8.13		46.88	8.4	8.13		46.88	9.2	8.13		46.88	45.403	8.13		46.88	41.6	12.5		46.88	218.8	8.13		46.88	440.6
8.13	94.2	46.88	120	8.13	106.2	46.88	117	8.13		46.88	9.2	8.13		46.88	9.4	8.13		46.88	42.8	8.13		46.88	47.6	12.5		46.88	246	8.13		46.88	432
8.13	91.4	46.88	111.4	8.13	101.4	46.88	122	8.13		46.88	8.6	8.13		46.88	8.4	8.13		46.88	44.4	8.13		46.88	47.88	12.5		46.88	256	8.13		46.88	413.4
