# Supplementary material for: Response of conventional sunflower cultivars to drift rates of synthetic auxin herbicides
Source: PeerJ. 2024 Jan 10;12:e16729. doi: 10.7717/peerj.16729 (PMC10787541; doi:10.7717/peerj.16729)
Supplement: Supplemental Information 3 [file peerj-12-16729-s003.xlsx]

## Sheet: Crop Injury
Bosfora										Bosfora
FBP					Quinclorac					FBP					Quinclorac
Dose	7 DAT	14 DAT	28 DAT	Harvest	Dose	7 DAT	14 DAT	28 DAT	Harvest	Dose	7 DAT	14 DAT	28 DAT	Harvest	Dose	7 DAT	14 DAT	28 DAT	Harvest
2.03	62.5	70	85	95	11.72	12.5	12.5	45	50	2.03	45	55	72.5	90	11.72	17.5	20	25	37.5
2.03	70	77.5	90	92.5	11.72	15	17.5	47.5	45	2.03	50	65	77.5	87.5	11.72	12.5	10	40	45
2.03	65	70	92.5	87.5	11.72	15	20	35	40	2.03	50	67.5	80	75	11.72	20	20	45	37.5
2.03	57.5	72.5	87.5	95	11.72	12.5	10	42.5	45	2.03	65	72.5	75	87.5	11.72	20	25	35	35
4.06	70	82.5	95	100	23.44	10	20	50	45	4.06	75	80	90	92.5	23.44	25	30	55	45
4.06	67.5	80	97.5	95	23.44	25	17.5	52.5	60	4.06	70	85	85	95	23.44	35	25	50	35
4.06	62.5	70	87.5	95	23.44	30	27.5	45	55	4.06	60	70	80	90	23.44	25	20	35	45
4.06	65	82.5	90	100	23.44	20	25	57.5	55	4.06	50	75	80	87.5	23.44	20	25	35	40
8.13	77.5	75	100	100	46.88	40	35	62.5	65	8.13	70	80	100	100	46.88	35	37.5	50	60
8.13	72.5	85	100	100	46.88	32.5	40	45	55	8.13	80	90	100	100	46.88	30	27.5	55	50
8.13	75	90	100	100	46.88	27.5	45	57.5	65	8.13	70	85	100	100	46.88	25	35	52.5	45
8.13	85	85	100	100	46.88	35	35	65	60	8.13	80	80	100	100	46.88	30	30	37.5	53
